# Supplementary material for: WUSCHEL controls meristem function by direct regulation of cytokinin-inducible response regulators
Source: Springer Nature journal article supplement (doi:10.1038/nature04270), 2005-12-01
Supplement: 41586_2005_BFnature04270_MOESM1_ESM.pdf [file 41586_2005_BFnature04270_MOESM1_ESM.pdf]

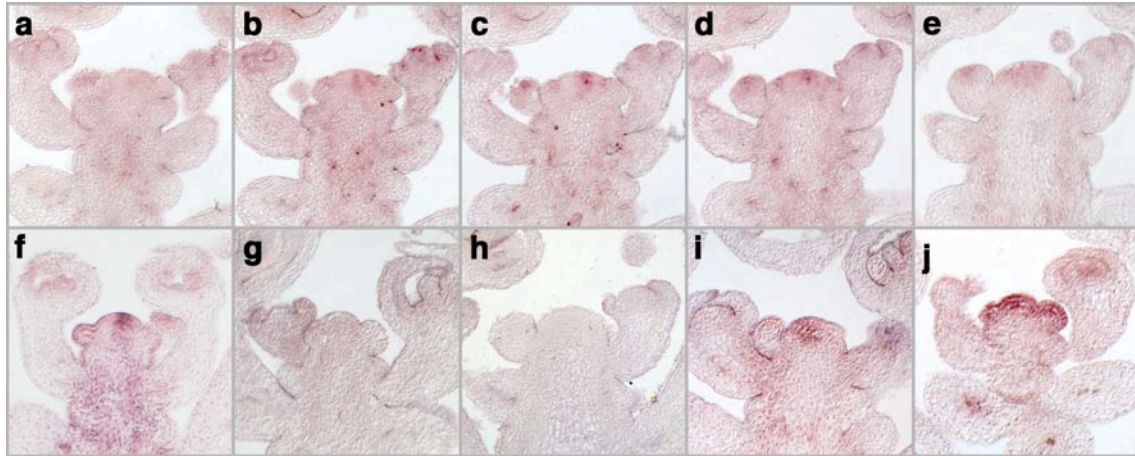

**Supplementary figure 1.** Expression patterns of *ARR7* RNA. **a)–e)** Serial sections through a wild-type inflorescence meristem hybridized with *ARR7* probe; **c)** section through the center of the meristem shown in Figure 2a); **f)** independent in situ hybridization of wild-type meristem; **g)** induced *35S::AlcR AlcA::WUS*; **h)** *clv3-7* mutant; **i)** induced *35S::AlcR AlcA::CLV3*; **j)** BA treated wild type.
