# Supplementary material for: WUSCHEL controls meristem function by direct regulation of cytokinin-inducible response regulators
Source: Springer Nature journal article supplement (doi:10.1038/nature04270), 2005-12-01
Supplement: 41586_2005_BFnature04270_MOESM2_ESM.pdf [file 41586_2005_BFnature04270_MOESM2_ESM.pdf]

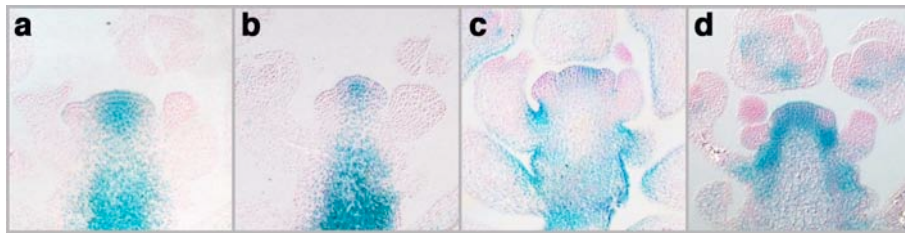

**Supplementary figure 2.** Activity of *ARR5*, *ARR6*, *ARR7* and *ARR15* GUS reporter genes. **a)** *ARR5::GUS* (To et al, Plant Cell. 2004 16:658-71); **b)** *ARR6::GUS* (To et al, Plant Cell. 2004 16:658-71); **c)** *ARR7::GUS*; **d)** *ARR15::GUS*
