# Supplementary material for: WUSCHEL controls meristem function by direct regulation of cytokinin-inducible response regulators
Source: Springer Nature journal article supplement (doi:10.1038/nature04270), 2005-12-01
Supplement: 41586_2005_BFnature04270_MOESM3_ESM.pdf [file 41586_2005_BFnature04270_MOESM3_ESM.pdf]

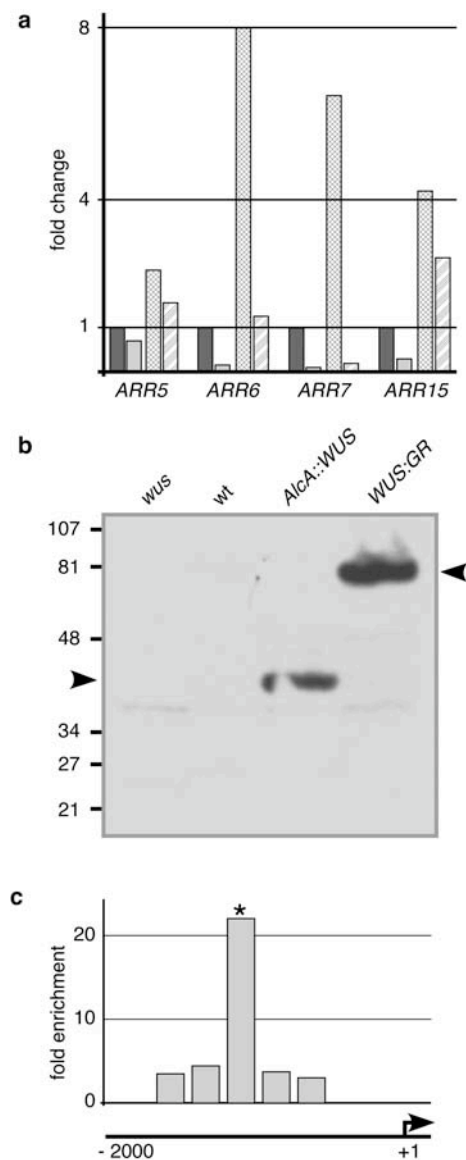

**Supplementary figure 3.** Direct interaction of WUS with regulatory sequences of *ARR7*. **a)** Real-time qRT-PCR following 4 hours DEX induction of *35S::WUS:GR* plants. Dark grey bars represent mock treatment, light grey bars represent DEX induction. Crossed bars indicate mock treatment in the presence of cycloheximide, hatched bars represent DEX induction in the presence of cycloheximide. Expression values are normalized to mock treatment controls. **b)** Western-blot of crude protein extract from *wus* mutants, wild-type, induced *35S::AlcR AlcA::WUS* and *35::WUS:GR* plants detected with the polyclonal anti-WUS antiserum used for ChIP. **c)** Chromatin-immunoprecipitation of *ARR7* promoter sequences using anti-WUS antiserum. ChIP was performed on leaves of *35S::WUS:GR* plants 4h after induction and compared to uninduced leaves without normalization to unrelated sequences. Fold enrichment of overlapping genomic fragments (approx size 200bp) upstream of the *ARR7* start codon is shown. Asterisk indicates promoter fragment used for gel shifts.
