# Supplementary material for: WUSCHEL controls meristem function by direct regulation of cytokinin-inducible response regulators
Source: Springer Nature journal article supplement (doi:10.1038/nature04270), 2005-12-01
Supplement: 41586_2005_BFnature04270_MOESM4_ESM.pdf [file 41586_2005_BFnature04270_MOESM4_ESM.pdf]

**Supplementary Table 1. Genes responsive to WUS induction**

Up-regulated genes:

| Affy identifier | AGI code  | Description                                                                                                             |
|-----------------|-----------|-------------------------------------------------------------------------------------------------------------------------|
| 261585_at       | At1g01010 | no apical meristem (NAM) family protein                                                                                 |
| 259433_at       | At1g01570 | fringe-related protein                                                                                                  |
| 264577_at       | At1g05260 | peroxidase 3 (PER3) (P3) / rare cold-inducible protein (RCI3A) (PRC)                                                    |
| 264580_at       | At1g05340 | expressed protein                                                                                                       |
| 261077_at       | At1g07430 | protein phosphatase 2C, putative / PP2C, putative                                                                       |
| 261198_at       | At1g12940 | high-affinity nitrate transporter, putative                                                                             |
| 262608_at       | At1g14120 | 2-oxoglutarate-dependent dioxygenase, putative                                                                          |
| 262887_at       | At1g14780 | expressed protein                                                                                                       |
| 260744_at       | At1g15010 | expressed protein                                                                                                       |
| 261663_at       | At1g18330 | myb family transcription factor                                                                                         |
| 262805_at       | At1g20900 | DNA-binding protein-related                                                                                             |
| 255943_at       | At1g22370 | UDP-glucuronosyl/UDP-glucosyl transferase family protein                                                                |
| 264859_at       | At1g24280 | glucose-6-phosphate 1-dehydrogenase, putative / G6PD, putative                                                          |
| 245650_at       | At1g24735 | caffeoyl-CoA 3-O-methyltransferase, putative                                                                            |
| 261191_at       | At1g32900 | starch synthase, putative                                                                                               |
| 261375_at       | At1g53160 | squamosa promoter-binding protein-like 4 (SPL4)                                                                         |
| 265119_at       | At1g62570 | flavin-containing monooxygenase family protein / FMO family protein                                                     |
| 262644_at       | At1g62710 | vacuolar processing enzyme beta / beta-VPE                                                                              |
| 261956_at       | At1g64590 | short-chain dehydrogenase/reductase (SDR) family protein                                                                |
| 260435_at       | At1g68320 | myb family transcription factor (MYB62)                                                                                 |
| 260264_at       | At1g68500 | expressed protein                                                                                                       |
| 262314_at       | At1g70810 | C2 domain-containing protein                                                                                            |
| 245734_at       | At1g73480 | hydrolase, alpha/beta fold family protein                                                                               |
| 262180_at       | At1g78050 | phosphoglycerate/bisphosphoglycerate mutase family protein                                                              |
| 262164_at       | At1g78070 | WD-40 repeat family protein                                                                                             |
| 262940_at       | At1g79520 | cation efflux family protein                                                                                            |
| 262045_at       | At1g80240 | expressed protein                                                                                                       |
| 263595_at       | At2g01890 | purple acid phosphatase, putative                                                                                       |
| 267436_at       | At2g19190 | light-responsive receptor protein kinase / senescence-responsive receptor-like serine/threonine kinase, putative (SIRK) |
| 265345_at       | At2g22680 | zinc finger (C3HC4-type RING finger) family protein                                                                     |
| 266830_at       | At2g22810 | 1-aminocyclopropane-1-carboxylate synthase 4 / ACC synthase 4 (ACS4)                                                    |
| 267261_at       | At2g23120 | expressed protein                                                                                                       |
| 267150_at       | At2g23510 | transferase family protein                                                                                              |
| 257365_x_at     | At2g26020 | plant defensin-fusion protein, putative (PDF1.2b)                                                                       |
| 266908_at       | At2g34650 | protein kinase PINOID (PID)                                                                                             |
| 255822_at       | At2g40610 | expansin, putative (EXP8)                                                                                               |
| 266364_at       | At2g41230 | expressed protein                                                                                                       |
| 263497_at       | At2g42540 | cold-responsive protein / cold-regulated protein (cor15a)                                                               |
| 263981_at       | At2g42870 | expressed protein                                                                                                       |
| 265261_at       | At2g42990 | GDSL-motif lipase/hydrolase family protein                                                                              |
| 260567_at       | At2g43820 | UDP-glucuronosyl/UDP-glucosyl transferase family protein                                                                |
| 266711_at       | At2g46740 | FAD-binding domain-containing protein                                                                                   |
| 266713_at       | At2g46760 | FAD-binding domain-containing protein                                                                                   |
| 258975_at       | At3g01970 | WRKY family transcription factor                                                                                        |
| 258971_at       | At3g01990 | ACT domain-containing protein (ACR6)                                                                                    |
| 259104_at       | At3g02170 | expressed protein                                                                                                       |
| 259042_at       | At3g03450 | gibberellin response modulator, putative / gibberellin-responsive modulator, putative                                   |

|           |           |                                                                                                                                                  |
|-----------|-----------|--------------------------------------------------------------------------------------------------------------------------------------------------|
| 259217_at | At3g03620 | MATE efflux family protein                                                                                                                       |
| 259015_at | At3g07350 | expressed protein                                                                                                                                |
| 256266_at | At3g12320 | expressed protein                                                                                                                                |
| 257051_at | At3g15270 | squamosa promoter-binding protein-like 5 (SPL5)                                                                                                  |
| 258275_at | At3g15760 | expressed protein                                                                                                                                |
| 258338_at | At3g16150 | L-asparaginase, putative / L-asparagine amidohydrolase, putative                                                                                 |
| 259327_at | At3g16460 | jacalin lectin family protein                                                                                                                    |
| 257673_at | At3g20370 | mepirin and TRAF homology domain-containing protein / MATH domain-containing protein                                                             |
| 257259_at | At3g22090 | expressed protein                                                                                                                                |
| 258107_at | At3g23560 | MATE efflux family protein                                                                                                                       |
| 258078_at | At3g25870 | expressed protein                                                                                                                                |
| 257635_at | At3g26280 | cytochrome P450 family protein                                                                                                                   |
| 257628_at | At3g26290 | cytochrome P450 71B26, putative (CYP71B26)                                                                                                       |
| 258059_at | At3g29035 | no apical meristem (NAM) family protein                                                                                                          |
| 256743_at | At3g29370 | expressed protein                                                                                                                                |
| 251925_at | At3g54000 | expressed protein                                                                                                                                |
| 251480_at | At3g59710 | short-chain dehydrogenase/reductase (SDR) family protein                                                                                         |
| 251363_at | At3g61250 | myb family transcription factor (MYB17)                                                                                                          |
| 255259_at | At4g05020 | NADH dehydrogenase-related                                                                                                                       |
| 245397_at | At4g14560 | auxin-responsive protein / indoleacetic acid-induced protein 1 (IAA1)                                                                            |
| 245560_at | At4g15480 | UDP-glucuronosyl/UDP-glucosyl transferase family protein                                                                                         |
| 245262_at | At4g16563 | aspartyl protease family protein                                                                                                                 |
| 254496_at | At4g20070 | peptidase M20/M25/M40 family protein                                                                                                             |
| 254234_at | At4g23680 | major latex protein-related / MLP-related                                                                                                        |
| 253908_at | At4g27260 | auxin-responsive GH3 family protein                                                                                                              |
| 253872_at | At4g27410 | no apical meristem (NAM) family protein (RD26)                                                                                                   |
| 253864_at | At4g27460 | CBS domain-containing protein                                                                                                                    |
| 253776_at | At4g28390 | ADP, ATP carrier protein, mitochondrial, putative / ADP/ATP translocase, putative / adenine nucleotide translocator, putative                    |
| 253722_at | At4g29190 | zinc finger (CCCH-type) family protein                                                                                                           |
| 253654_at | At4g30060 | expressed protein                                                                                                                                |
| 253630_at | At4g30490 | AFG1-like ATPase family protein                                                                                                                  |
| 253263_at | At4g34000 | ABA-responsive element-binding protein / abscisic acid responsive elements-binding factor (ABRE) / ABA-responsive elements-binding factor (ABF3) |
| 253103_at | At4g36110 | auxin-responsive protein, putative                                                                                                               |
| 252984_at | At4g37990 | mannitol dehydrogenase, putative (ELI3-2)                                                                                                        |
| 252859_at | At4g39780 | AP2 domain-containing transcription factor, putative                                                                                             |
| 252822_at | At4g39955 | hydrolase, alpha/beta fold family protein                                                                                                        |
| 251060_at | At5g01820 | CBL-interacting protein kinase 14 (CIPK14)                                                                                                       |
| 251039_at | At5g02020 | expressed protein                                                                                                                                |
| 251025_at | At5g02190 | aspartyl protease family protein                                                                                                                 |
| 251013_at | At5g02540 | short-chain dehydrogenase/reductase (SDR) family protein                                                                                         |
| 251010_at | At5g02550 | expressed protein                                                                                                                                |
| 250665_at | At5g06980 | expressed protein                                                                                                                                |
| 246562_at | At5g15580 | expressed protein                                                                                                                                |
| 250054_at | At5g17860 | cation exchanger, putative (CAX7)                                                                                                                |
| 249910_at | At5g22630 | prephenate dehydratase family protein                                                                                                            |
| 249065_at | At5g44260 | zinc finger (CCCH-type) family protein                                                                                                           |
| 249052_at | At5g44420 | plant defensin protein, putative (PDF1.2a)                                                                                                       |
| 248509_at | At5g50335 | expressed protein                                                                                                                                |
| 248337_at | At5g52310 | low-temperature-responsive protein 78 (LTI78) / desiccation-responsive protein 29A (RD29A)                                                       |

|           |           |                                              |
|-----------|-----------|----------------------------------------------|
| 248243_at | At5g53590 | auxin-responsive family protein              |
| 248205_at | At5g54300 | expressed protein                            |
| 248028_at | At5g55620 | expressed protein                            |
| 247280_at | At5g64260 | phosphate-responsive protein, putative       |
| 247228_at | At5g65140 | trehalose-6-phosphate phosphatase, putative  |
| 247024_at | At5g66985 | expressed protein                            |
| 247023_at | At5g67060 | basic helix-loop-helix (bHLH) family protein |
| 247035_at | At5g67110 | basic helix-loop-helix (bHLH) family protein |

## Down-regulated genes:

| Affy identifier | AGI code  | Description                                                                                          |
|-----------------|-----------|------------------------------------------------------------------------------------------------------|
| 264841_at       | At1g03740 | protein kinase family protein                                                                        |
| 262793_at       | At1g13110 | cytochrome P450 71B7 (CYP71B7)                                                                       |
| 256069_at       | At1g13740 | expressed protein                                                                                    |
| 262704_at       | At1g16530 | LOB domain protein 3 / lateral organ boundaries domain protein 3 (LBD3)                              |
| 259466_at       | At1g19050 | two-component responsive regulator / response regulator 7 (ARR7)                                     |
| 245662_at       | At1g28190 | expressed protein                                                                                    |
| 259546_at       | At1g35350 | EXS family protein / ERD1/XPR1/SYG1 family protein                                                   |
| 264636_at       | At1g65490 | expressed protein                                                                                    |
| 262360_at       | At1g73080 | leucine-rich repeat transmembrane protein kinase, putative                                           |
| 262212_at       | At1g74890 | two-component responsive regulator / response regulator 15 (ARR15)                                   |
| 266175_at       | At2g02450 | no apical meristem (NAM) family protein                                                              |
| 267262_at       | At2g22990 | sinapoylglucose                                                                                      |
| 267524_at       | At2g30600 | BTB/POZ domain-containing protein                                                                    |
| 267523_at       | At2g30610 | unknown protein                                                                                      |
| 267550_at       | At2g32800 | protein kinase family protein                                                                        |
| 266008_at       | At2g37390 | heavy-metal-associated domain-containing protein                                                     |
| 266983_at       | At2g39400 | hydrolase, alpha/beta fold family protein                                                            |
| 267392_at       | At2g44490 | glycosyl hydrolase family 1 protein                                                                  |
| 259129_at       | At3g02150 | TCP family transcription factor, putative                                                            |
| 257641_s_at     | At3g25760 | early-responsive to dehydration stress protein (ERD12)                                               |
| 257315_at       | At3g30775 | proline oxidase, mitochondrial / osmotic stress-responsive proline dehydrogenase (POX) (PRO1) (ERD5) |
| 252377_at       | At3g47960 | proton-dependent oligopeptide transport (POT) family protein                                         |
| 252374_at       | At3g48100 | two-component responsive regulator / response regulator 5 (ARR5) / response reactor 2 (RR2)          |
| 256671_at       | At3g52290 | calmodulin-binding family protein                                                                    |
| 251987_at       | At3g53280 | cytochrome P450 71B5 (CYP71B5)                                                                       |
| 251342_at       | At3g60690 | auxin-responsive family protein                                                                      |
| 245305_at       | At4g17215 | expressed protein                                                                                    |
| 254553_at       | At4g19530 | disease resistance protein (TIR-NBS-LRR class), putative                                             |
| 254321_at       | At4g22590 | trehalose-6-phosphate phosphatase, putative                                                          |
| 245229_at       | At4g25620 | hydroxyproline-rich glycoprotein family protein                                                      |
| 253571_at       | At4g31000 | calmodulin-binding protein                                                                           |
| 253215_at       | At4g34950 | nodulin family protein                                                                               |
| 252950_at       | At4g38690 | 1-phosphatidylinositol phosphodiesterase-related                                                     |
| 250663_at       | At5g07110 | prenylated rab acceptor (PRA1) family protein                                                        |
| 246114_at       | At5g20250 | raffinose synthase family protein / seed imbibition protein, putative (din10)                        |
| 249835_s_at     | At5g23510 | expressed protein                                                                                    |
| 246931_at       | At5g25170 | expressed protein                                                                                    |
| 249393_at       | At5g40170 | disease resistance family protein                                                                    |

---

|           |           |                                                                  |
|-----------|-----------|------------------------------------------------------------------|
| 249309_at | At5g41410 | homeodomain protein (BEL1)                                       |
| 248622_at | At5g49360 | glycosyl hydrolase family 3 protein                              |
| 247794_at | At5g58670 | phosphoinositide-specific phospholipase C (PLC1)                 |
| 247679_at | At5g59540 | oxidoreductase, 2OG-Fe(II) oxygenase family protein              |
| 247524_at | At5g61440 | thioredoxin family protein                                       |
| 247406_at | At5g62920 | two-component responsive regulator / response regulator 6 (ARR6) |
