# Supplementary material for: WUSCHEL controls meristem function by direct regulation of cytokinin-inducible response regulators
Source: Springer Nature journal article supplement (doi:10.1038/nature04270), 2005-12-01
Supplement: 41586_2005_BFnature04270_MOESM5_ESM.pdf [file 41586_2005_BFnature04270_MOESM5_ESM.pdf]

Supplementary Table 2. Oligonucleotides used in Leibfried et al.

| Purpose                                           | Gene                             | Name                 | Sequence                                    |                                             |
|---------------------------------------------------|----------------------------------|----------------------|---------------------------------------------|---------------------------------------------|
| TaqMan probes                                     | <i>TUBULIN</i>                   | G-4558               | CAC TCA TCA GCA TTC TCA ACA AG              |                                             |
|                                                   | <i>ARR5</i>                      | G-4560               | CTC TTC ACA TCA GCT AAT TTC ACA G           |                                             |
|                                                   | <i>ARR6</i>                      | G-4561               | CTC TCT CTT CTG AAT ACT CTT TGT G           |                                             |
|                                                   | <i>ARR7</i>                      | G-4562               | TGT CAT CTG AGA ACA TCT TAC CT              |                                             |
|                                                   | <i>ARR15</i>                     | G-4563               | AAC TCC TCT GCT CCT TCT ATC AT              |                                             |
| GUS reporters                                     | <i>ARR7</i>                      | G-3523               | CAG CTG CAG TTG TAG CTA TCG TGA C           |                                             |
|                                                   |                                  | G-3524               | GTC CTG CAG GTT CCA AGA AGA GGA AAG         |                                             |
|                                                   |                                  | G-3529               | ACG CTG CAG AAG TGA CTT CTT GGG TA          |                                             |
|                                                   | <i>ARR15</i>                     | G-3530               | GTC CTG CAG CTC TCG GGA AAG TAA             |                                             |
| qRT-PCR<br><i>WUS:GR</i> and<br><i>AlcA::CLV3</i> | <i>TUBULIN</i>                   | N-0078               | GAG CCT TAC AAC GCT ACT CTG TCT GTC         |                                             |
|                                                   |                                  | N-0079               | ACA CCA GAC ATA GTA GCA GAA ATC AAG         |                                             |
|                                                   | <i>ARR5</i>                      | G-0935               | CAT CTT GCC TCG TAT CGA TAG                 |                                             |
|                                                   |                                  | G-0830               | GTC TCT AGA TCA GAT CTT TGC GCG T           |                                             |
|                                                   | <i>ARR6</i>                      | G-0936               | CGG TAT GAC TGG ATA TGA AC                  |                                             |
|                                                   |                                  | G-3549               | ATT TGC ATC GGA GAG CTC                     |                                             |
|                                                   | <i>ARR7</i>                      | G-0937               | GCA TTC AGA GAA GTA CCA GTA GTG             |                                             |
|                                                   |                                  | G-3490               | GCT AAG GTC TTG GCC TCT ATA C               |                                             |
|                                                   |                                  | <i>ARR15</i>         | G-0938                                      | CTT CAG CAC TCA GAG AAA TCC                 |
|                                                   |                                  |                      | G-0836                                      | GTC TCT AGA TTA ACC CCT AGA CTC T           |
|                                                   | mutagenic<br><i>ARR7</i> primers | <i>ARR7</i> D85=> E  | G-4151                                      | GGT GAA TTT GAT AGT GAC GGA ATA CTC AAT GCC |
| G-4152                                            |                                  |                      | GGC ATT GAG TAT TCC GTC ACT ATC AAA TTC ACC |                                             |
| <i>ARR7</i> D85=> N                               |                                  | G-4149               | GGT GAA TTT GAT AGT GAC GAA TTA CTC AAT GCC |                                             |
|                                                   |                                  | G-4150               | GGC ATT GAG TAA TTC GTC ACT ATC AAA TTC ACC |                                             |
| qRT-PCR<br><i>AlcA::WUS</i> time<br>series        | <i>TUBULIN</i>                   | N-0078               | GAG CCT TAC AAC GCT ACT CTG TCT GTC         |                                             |
|                                                   |                                  | N-0079               | ACA CCA GAC ATA GTA GCA GAA ATC AAG         |                                             |
|                                                   | <i>ARR5</i>                      | G-0935               | CAT CTT GCC TCG TAT CGA TAG                 |                                             |
|                                                   |                                  | G-0830               | GTC TCT AGA TCA GAT CTT TGC GCG T           |                                             |
|                                                   | <i>ARR6</i>                      | G-0936               | CGG TAT GAC TGG ATA TGA AC                  |                                             |
|                                                   |                                  | G-0832               | GTC TCT AGA TCA GAT CTT TGC GCG TT          |                                             |
|                                                   | <i>ARR7</i>                      | G-0937               | GCA TTC AGA GAA GTA CCA GTA GTG             |                                             |
|                                                   |                                  | G-0834               | GTC TCT AGA TCA AAG TAG AGA AAA A           |                                             |
|                                                   | <i>ARR15</i>                     | G-0938               | CTT CAG CAC TCA GAG AAA TCC                 |                                             |
|                                                   |                                  | G-0836               | CTT CAG CAC TCA GAG AAA TCC                 |                                             |
|                                                   | ChIP                             | <i>ARR7</i> promoter | G-4435                                      | CGT GAC TAT ATC ATC AAT AGT CCG             |
| G-4436                                            |                                  |                      | TCA TCC ATT TGC TCC GTA CCT A               |                                             |
| G-4425                                            |                                  |                      | ACG GAG CAA ATG GAT GAC TGT                 |                                             |
| G-4426                                            |                                  |                      | CGT GCC AAA CAA AAC ATT GG                  |                                             |
| G-4423                                            |                                  |                      | GTT TGG CAC GAT CAT CAA ATG                 |                                             |
| G-4424                                            |                                  |                      | TGT TGA GAT CTA CAA GAA TCT AGC A           |                                             |
| G-4421                                            |                                  |                      | TGC TAG ATT CTT GTA GAT CTC AAC A           |                                             |
| G-4422                                            |                                  |                      | TCT TCA AAA GTT GTG GAG GAG G               |                                             |
| G-4419                                            |                                  |                      | CCT CCT CCA CAA CTT TTG AAG ATT             |                                             |
| G-4420                                            |                                  |                      | ACC AGG ACA ACA GCC ATA TCA T               |                                             |
| G-4417                                            |                                  |                      | GGC TGT TGT CCT GGT ATT ATT TCT C           |                                             |
| G-4418                                            |                                  |                      | TAT TGC GGG TGG ATC CTT TT                  |                                             |
| G-4415                                            |                                  |                      | ATC CAC CCG CAA TAC TTT GT                  |                                             |
| G-4416                                            |                                  |                      | AGT GGA CCA TTG TGT GTG ATT TG              |                                             |
| G-4413                                            |                                  |                      | CAC ACA ATG GTC CAC TAA ACA GA              |                                             |
| G-4414                                            |                                  |                      | GTC ATC GTT TTC AGT TGA GTT TCC             |                                             |
| G-4411                                            |                                  |                      | GGA AAC TCA ACT GAA AAC GAT GAC             |                                             |
| G-4412                                            |                                  |                      | TGT GTA ATG GTA TGA TGG TGA TAC T           |                                             |
| G-4433                                            |                                  |                      | AGT ATC ACC ATC ATA CCA TTA CAC A           |                                             |
| G-4434                                            |                                  |                      | CCT CTC TCT CTC TTC TTT TTT CTT T           |                                             |
| G-4431                                            |                                  |                      | AAA GAA AAA AGA AGA GAG AGA GAG G           |                                             |
| G-4432                                            |                                  |                      | GGA AGT GTC AGA AAA CAC AAA TAA             |                                             |
| G-4429                                            |                                  |                      | CTG ACA CTT CCC AAA CAC ATA ACA             |                                             |
| G-4430                                            |                                  |                      | GAA GAA GAA GTT AGG TTA GGT GAC A           |                                             |
| G-4427                                            |                                  |                      | TGC CGT CGA TGA TAG TAT TGT G               |                                             |
| G-4428                                            |                                  |                      | GAG GAG AGT TTG TTA ATG AAG AAG A           |                                             |
| <i>MYB97</i> coding (control)                     |                                  |                      | G-3262                                      | TCT CCG ACC TTT CTT CAC ACC CAT TCC         |
|                                                   |                                  |                      | G-3263                                      | GTC TCC GCT TAG GAG CAC GAA AGC TAT C       |
| <i>FLC</i> promoter (control)                     |                                  |                      | G-2622                                      | ATT GAT TCA TAT TTT TCA TAC ACA G           |
|                                                   |                                  |                      | G-1793                                      | AAT TAG ACC AGT TTA TGT ACA GCA             |
| <i>ARR6</i> coding (control)                      |                                  |                      | G-4270                                      | GCC ACC ATG GTT TCA CAT CAT ATC             |
|                                                   |                                  |                      | G-4271                                      | CCT TTG CAA GAA GAT ACT CTG AGC             |
| <i>HSF1</i> promoter (control)                    |                                  |                      | G-4680                                      | GCT ATC CAC AGG TTA GAT AAA GGA G           |
|                                                   |                                  |                      | G-4681                                      | GAG AAA GAT TGT GTG AGA ATG AAA             |
