# Supplementary material for: WUSCHEL controls meristem function by direct regulation of cytokinin-inducible response regulators
Source: Springer Nature journal article supplement (doi:10.1038/nature04270), 2005-12-01
Supplement: 41586_2005_BFnature04270_MOESM6_ESM.pdf [file 41586_2005_BFnature04270_MOESM6_ESM.pdf]

***arr3,4,5,6,7,8,9* mutant**

For construction of the *arr3,4,5,6,7,8,9* septuple mutant the T-DNA insertions mapped to the following positions relative to the ATG:

| Mutant      | Locus     | Insertion site | Mutant      | Locus     | Insertion site |
|-------------|-----------|----------------|-------------|-----------|----------------|
| <i>arr3</i> | At1g59940 | 801            | <i>arr7</i> | At1g19050 | 642-660        |
| <i>arr4</i> | At1g10470 | 817            | <i>arr8</i> | At2g41310 | 35             |
| <i>arr5</i> | At3g48100 | 689            | <i>arr9</i> | At3g57040 | 782            |
| <i>arr6</i> | At5g62920 | 1021           |             |           |                |

**Chromatin Immuno-Precipitation (ChIP)**

ChIP was conducted with modifications after Wang, H., Tang, W., Zhu, C. & Perry, S. E. A chromatin immunoprecipitation (ChIP) approach to isolate genes regulated by AGL15, a MADS domain protein that preferentially accumulates in embryos. *Plant J* **32**, 831-43 (2002).

1. fix 500 mg of tissue with 0,3% formaldehyde in MC buffer for 1h under vacuum (turn on and off vacuum 4 times and give sufficient time to adapt)
2. wash 3 times with MC buffer
3. wet Miracloth filter with M1 buffer (without protease inhibitor)
4. grind tissue under liquid N<sub>2</sub>
5. transfer ground tissue to Miracloth filter
6. add 15 ml M1 buffer and filtrate slurry through Miracloth into a falcon tube
7. reapply flow-through 2 times
8. spin flow-through (1,000g; 10 min; 4°C)
9. wash pellet carefully 5 times with 1 ml M2-Buffer (2,000g; 5 min; 4°C)
10. wash pellet with 1ml of M3 Buffer (2,000g; 5 min; 4°C)
11. resuspend crude nuclear pellet in 1 ml Sonication buffer
12. solubilize chromatin on ice using sonicator with microtip (Branson 450; output 3; Cont., 8 \* 5")
13. centrifuge (top speed; 5 min; 4°C)
14. remove 250 µl and freeze (for input DNA controls and size check)
15. mix supernatant with equal amount of IP buffer (750 µl)
16. preabsorb 1h-ON at 4°C with 7.5 µl preimmune serum

17. spin (top speed; 5 min; 4°C)
18. mix supernatant with with 40 µl protein G-Sepharose (Sigma, 50% slurry in 10 mM Tris, pH 7.5 and 150 mM NaCl)
19. incubate on a rotating wheel for 1h at 4°C
20. spin (top speed; 5 min; 4°C)
21. divide supernatant in 2 equal fractions and transfer to fresh tubes
22. add 2.5µl of specific antiserum to one tube and preimmune serum to other tube
23. incubate on rotating wheel for 1h at 4°C
24. spin (top speed; 2 min; 4°C)
25. mix supernatant with 20µl protein G-Sepharose (Sigma)
26. incubate on a rotating wheel for 1h at 4°C
27. pellet beads (top speed; 2 min; 4°C; save supernatant as 'post bind fraction')
28. wash 5 times with 1ml IP-Buffer on rotating wheel for 10 min at RT
29. transfer beads and wash to a new tube
30. spin (top speed; 2 min; RT) and remove supernatant fully
31. add 100 µl ice cold glycine elution buffer
32. vortex 30", then spin (top speed; 1 min; RT)
33. transfer supernatant to fresh tube with 50 µl of TRIS buffer (1M; pH9)
34. repeat 31 to 33 twice
35. spin (top speed; 2 min; RT)
36. transfer supernatant to fresh tube and add 1 µl RNase A (10 mg/ml)
37. incubate for 15min at 37°C
38. optional: save an aliquot to check for protein
39. add 1.5 µl proteinase K (18,2 mg/ml, Roche Diagnostics)
40. incubate ON at 37°C
41. add 1.5 µl proteinase K (18,2 mg/ml, Roche Diagnostics)
42. incubate at 65 °C for 6h
43. remove proteins by phenol/chloroform extraction
44. precipitate DNA with 2.5 vol ethanol, 1/10 vol 3M NaAc pH 5.4, and 1 µl glycogen
45. resuspend DNA in 10-30 µl 10 mM Tris, pH 8

**ChIP buffers****MC-Buffer:**

10 mM sodium phosphate, pH 7  
50 mM NaCl  
0.1 M sucrose

**M1 buffer**

M3 Buffer with 1M 2-methyl 2,4-pentanediol

**M2 buffer**

M1 buffer with 10 mM MgCl<sub>2</sub>  
0.5% Triton X-100

**M3 buffer**

10 mM sodium phosphate, pH 7  
0.1 M NaCl  
10 mM beta- mercaptoethanol  
Complete Protease Inhibitor Cocktail (Roche Diagnostics GmbH, Mannheim, Germany)

**Sonication buffer**

10 mM sodium phosphate, pH 7  
0.1 M NaCl  
0.5% Sarkosyl  
10 mM EDTA  
Complete Protease Inhibitor Cocktail (Roche Diagnostics GmbH)  
1 mM PEFABLOCK (Roche Diagnostics)

**IP buffer**

50 mM Hepes, pH 7.5  
150 mM KCl  
5mM MgCl<sub>2</sub>  
10 μM ZnSO<sub>4</sub>  
1% Triton X-100  
0.05% SDS

**Glycine elution buffer**

0.1 M glycine  
0.5 M NaCl  
0.05% Tween-20  
pH 2.8
